# Supplementary material for: Nanosensor dosimetry of mouse blood proteins after exposure to ionizing radiation
Source: PubMed Central journal article supplement — Sci Rep. 2013 Jul 19;3:2234. doi: 10.1038/srep02234 (PMC3715761; doi:10.1038/srep02234), 2013-07-19
Supplement: srep02234-s1.pdf [file srep02234-s1.pdf]

## Supplementary Information

### Nanosensor biodosimetry of mouse blood proteins after exposure to ionizing radiation

Dokyoon Kim<sup>1</sup>, Francesco Marchetti<sup>8,9</sup>, Zuxiong Chen<sup>1</sup>, Sasa Zanic<sup>1</sup>, Robert J. Wilson<sup>1</sup>, Drew A. Hall<sup>2</sup>, Richard S. Gaster<sup>3</sup>, Jung-Rok Lee<sup>4</sup>, Junyi Wang<sup>2</sup>, Sebastian J. Osterfeld<sup>5</sup>, Heng Yu<sup>5</sup>, Robert M. White<sup>1</sup>, William F. Blakely<sup>6</sup>, Leif Peterson<sup>7</sup>, Sandhya Bhatnagar<sup>8</sup>, Brandon Manion<sup>8</sup>, Serena Tseng<sup>8</sup>, Kristen Roth<sup>8</sup>, Matthew Coleman<sup>8</sup>, Antoine M. Snijders<sup>8</sup>, Andrew J. Wyrobek<sup>8,\*</sup>, and Shan X. Wang<sup>1,2,\*</sup>

<sup>1</sup>Department of Materials Science and Engineering, <sup>2</sup>Department of Electrical Engineering, <sup>3</sup>Department of Bioengineering, <sup>4</sup>Department of Mechanical Engineering, Stanford University, Stanford, California 94305, <sup>5</sup>MagArray Inc., 1230 Bordeaux Drive, Sunnyvale, CA 94089, <sup>6</sup>Armed Forces Radiobiology Research Institute, Uniformed Services University of the Health Sciences, Bethesda, Maryland 20889, <sup>7</sup>Center for Biostatistics, The Methodist Hospital Research Institute, Houston, Texas 77030, <sup>8</sup>Life Sciences Division, Lawrence Berkeley National Laboratory, Berkeley, California 94720, USA; <sup>9</sup>Environmental Health Science Research Bureau, Health Canada, Ottawa, ON K1A 0K9, Canada

Correspondence and requests for materials should be addressed to S.X.W. (email: [sxwang@stanford.edu](mailto:sxwang@stanford.edu)) or to A.J.W. (email: [ajwyrobek@lbl.gov](mailto:ajwyrobek@lbl.gov)).

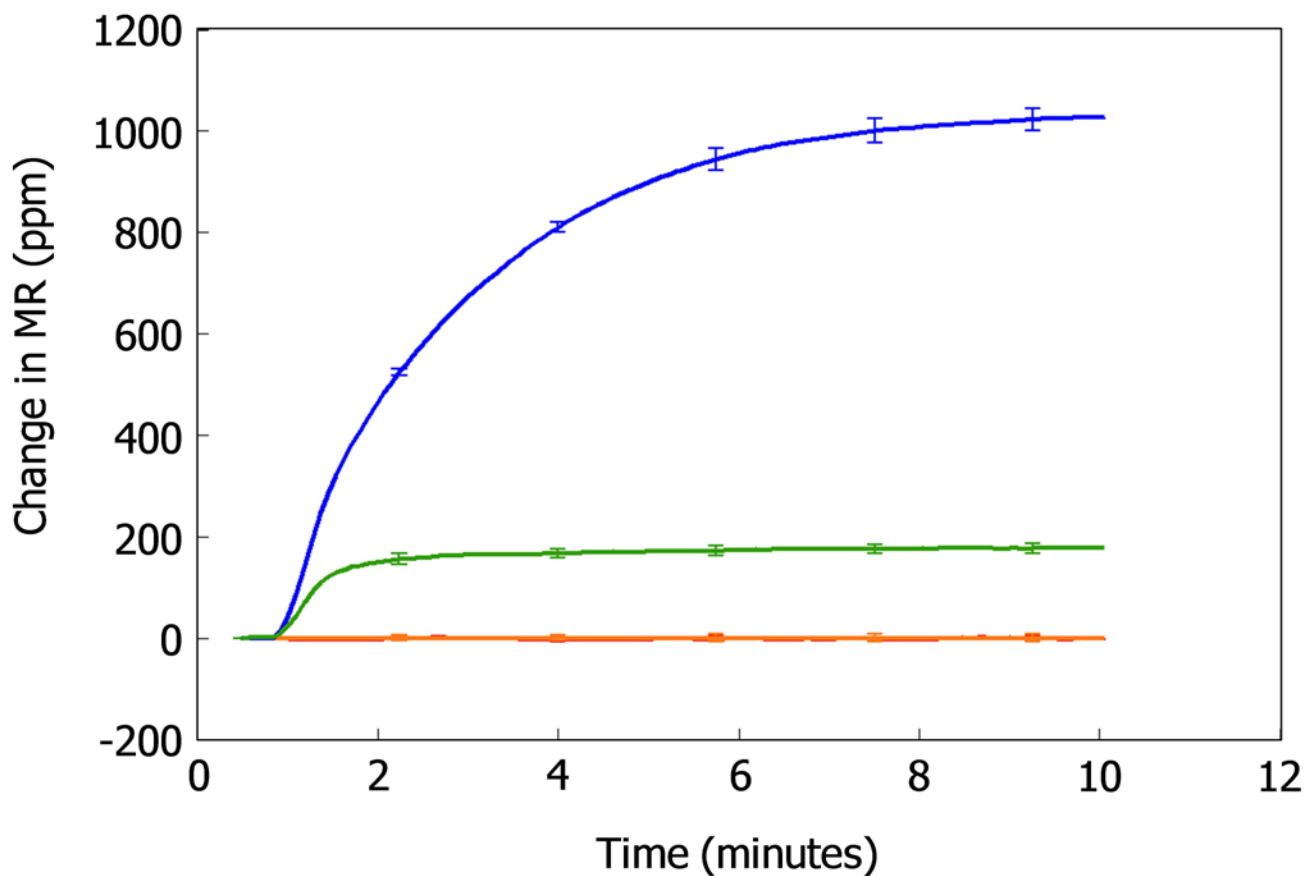

**Figure S1** | An example of real-time binding curve showing change in magnetoresistance (MR) in parts per million (ppm) over time for 500 pg/ml Flt3lg (green) compared with biotin-BSA positive control (blue), BSA negative control (orange), and epoxy reference (red). Error bars are  $\pm 1$  standard deviation.

|       | sham vs. 0.1 Gy | sham vs. 1 Gy | sham vs. 2 Gy | sham vs. 3 Gy | sham vs. 6 Gy |
|-------|-----------------|---------------|---------------|---------------|---------------|
| day 1 | 0.1263          | 0.0070        | < 0.0001      | < 0.0001      | < 0.0001      |
| 2     | 0.9048          | < 0.0001      | < 0.0001      | < 0.0001      | < 0.0001      |
| 3     | 0.3520          | < 0.0001      | < 0.0001      | < 0.0001      | < 0.0001      |
| 5     | 0.1295          | 0.0006        | < 0.0001      | < 0.0001      | < 0.0001      |
| 7     | 0.5184          | 0.7518        | < 0.0001      | < 0.0001      | < 0.0001      |

**Table S1** | P values associated with two-tailed Student's t-test for Flt3lg concentrations after comparing sham and irradiated groups. Raw concentrations of Flt3lg were used for the calculation. Here, "sham" group indicates the pre-irradiation samples collected from all mice 8 days before irradiation and the samples collected from sham-irradiated mice. This definition is applicable to Tables S1-S6.

|       | sham vs. 0.1 Gy | 0.1 Gy vs. 1 Gy | 1 Gy vs. 2 Gy | 2 Gy vs. 3 Gy | 3 Gy vs. 6 Gy |
|-------|-----------------|-----------------|---------------|---------------|---------------|
| day 1 | 0.1263          | 0.0122          | 0.0235        | 0.446         | 0.0073        |
| 2     | 0.9048          | 0.0002          | 0.0002        | < 0.0001      | 0.1765        |
| 3     | 0.3520          | 0.0001          | 0.0008        | < 0.0001      | 0.0973        |
| 5     | 0.1295          | 0.0053          | 0.0071        | 0.0001        | 0.0009        |
| 7     | 0.5184          | 0.7672          | 0.0189        | 0.0399        | < 0.0001      |

**Table S2** | P values associated with two-tailed Student's t-test for Flt3lg concentrations after comparing immediately lower dose groups at the same day. Raw concentrations of Flt3lg were used for the calculation.

The dose discriminant analysis was done to assess how accurately we can classify radiation dose groups at a given day after irradiation based on the concentrations of biomarkers. For example, if all the 6 Gy samples at day 5 after irradiation are correctly classified as such, the sensitivity for 6 Gy is 1. If all of the non-6 Gy samples at day 5 are not classified as 6 Gy, the specificity for 6 Gy is 1. For each cell in Table S3, the DISCRIM procedure in SAS software calculates true positives, false positives, true negatives, and false negatives, and then computes the sensitivity, specificity, positive predictive values (PPV), and negative predictive values (NPV) for the given dose group at a given day post irradiation. All the other radiation dose groups at the same day post irradiation are treated as references. For example, 2 Gy radiation dose group at day 2 has sham, 1, 3, 6 Gy radiation dose groups at day 2 as its references.

Many of the dose groups have excellent sensitivity, specificity, PPV and NPV values. The low PPV and sensitivity values for sham and for 1 Gy at day 7 are due to the fact that the Flt3lg concentrations of the sham and 1 Gy groups are quite similar, resulting in higher number of false positives and false negatives. For example, among the samples classified as 1 Gy at day 7 post irradiation, 80% of them are false positives from 0 or 2 Gy samples. In contrast, the concentration differences at day 7 between sham or 1 Gy groups and 3 or 6 Gy groups are much larger, so the latter groups have much higher PPV and sensitivity values.

|       | sham         | 1 Gy  | 2 Gy  | 3 Gy  | 6 Gy  |       |
|-------|--------------|-------|-------|-------|-------|-------|
| day 1 | sensitivity: | 1     | 0.800 | 0     | 0.800 | 0.800 |
|       | specificity: | 0.909 | 0.958 | 0.955 | 0.917 | 0.833 |
|       | PPV:         | 0.778 | 0.800 | 0     | 0.667 | 0.500 |
|       | NPV:         | 1     | 0.958 | 0.750 | 0.957 | 0.952 |
| 2     |              | 1     | 0.800 | 0.875 | 0.800 | 0.400 |
|       |              | 0.957 | 1     | 0.955 | 0.880 | 0.960 |
|       |              | 0.875 | 0.800 | 0.875 | 0.571 | 0.667 |
|       |              | 1     | 0.962 | 0.955 | 0.957 | 0.889 |

|   |       |       |       |       |       |
|---|-------|-------|-------|-------|-------|
| 3 | 0.857 | 1     | 0.875 | 0.800 | 0.800 |
|   | 1     | 0.920 | 1     | 0.960 | 0.960 |
|   | 1     | 0.714 | 1     | 0.800 | 0.800 |
|   | 0.958 | 1     | 0.957 | 0.960 | 0.960 |
| 5 | 0.857 | 0.800 | 0.875 | 1     | 1     |
|   | 0.913 | 0.960 | 1     | 1     | 1     |
|   | 0.750 | 0.800 | 0.875 | 1     | 1     |
|   | 0.955 | 0.960 | 0.957 | 1     | 1     |
| 7 | 0.143 | 0.400 | 0.500 | 0.800 | 1     |
|   | 0.826 | 0.680 | 0.955 | 0.960 | 1     |
|   | 0.200 | 0.200 | 0.800 | 0.800 | 1     |
|   | 0.760 | 0.850 | 0.840 | 0.960 | 1     |

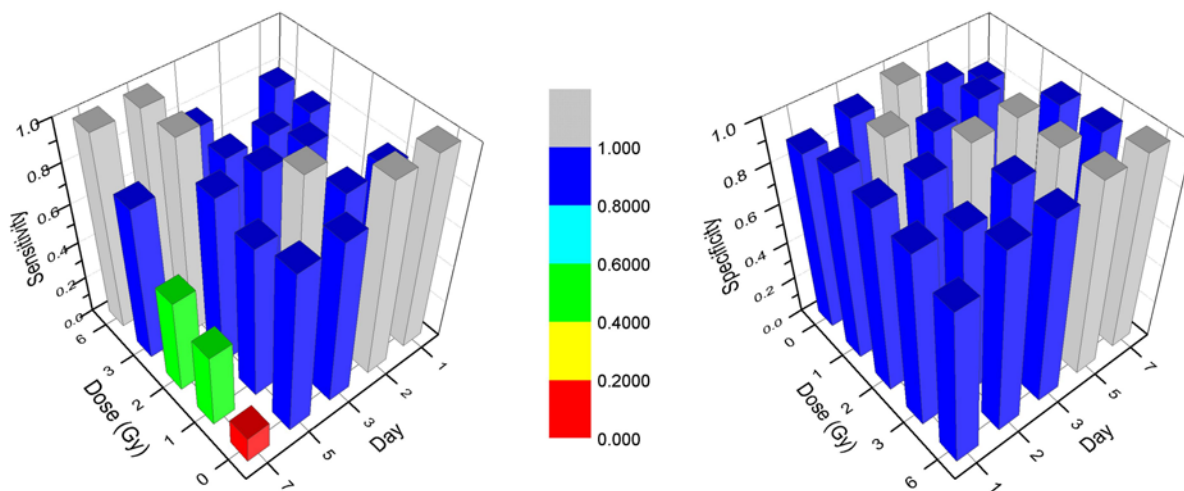

**Table S3** | Sensitivity, specificity, positive predictive values (PPV), and negative predictive values (NPV) obtained by dose discriminant analysis for classification of radiation dose groups at a given day post irradiation. Flt3lg concentrations in sham, 1, 2, 3, and 6 Gy irradiated samples were used for the analysis. 3-D plots for sensitivity and specificity are shown below the table.

|       | sham vs. 0.1 Gy | sham vs. 1 Gy | sham vs. 2 Gy | sham vs. 3 Gy | sham vs. 6 Gy |
|-------|-----------------|---------------|---------------|---------------|---------------|
| day 1 | 0.4067          | <0.0001       | <0.0001       | <0.0001       | <0.0001       |
| 2     | 0.5588          | <0.0001       | <0.0001       | <0.0001       | <0.0001       |

**Table S4** | P values associated with two-tailed Student's t-test for Saa1 concentrations after comparing sham and irradiated groups. Raw concentrations of Saa1 were used for the calculation.

|       | sham vs. 0.1 Gy | 0.1 Gy vs. 1 Gy | 1 Gy vs. 2 Gy | 2 Gy vs. 3 Gy | 3 Gy vs. 6 Gy |
|-------|-----------------|-----------------|---------------|---------------|---------------|
| day 1 | 0.4067          | 0.0011          | 0.0614        | 0.9692        | 0.7122        |
| 2     | 0.5588          | 0.0352          | 0.6672        | 0.2822        | 0.2439        |

**Table S5** | P values associated with two-tailed Student's t-test for Saa1 concentrations after comparing immediately lower dose groups at the same day. Raw concentrations of Saa1 were used for the calculation.

|       | sham         | 1 Gy  | 2 Gy  | 3 Gy  | 6 Gy  |       |
|-------|--------------|-------|-------|-------|-------|-------|
| day 1 | sensitivity: | 1     | 0.800 | 0.250 | 0     | 0.400 |
|       | specificity: | 1     | 0.640 | 0.955 | 0.960 | 0.840 |
|       | PPV:         | 1     | 0.308 | 0.667 | 0     | 0.333 |
|       | NPV:         | 1     | 0.941 | 0.778 | 0.828 | 0.875 |
| 2     |              | 1     | 0.200 | 0     | 0.200 | 0.600 |
|       |              | 0.870 | 0.840 | 1     | 0.800 | 0.760 |
|       |              | 0.700 | 0.200 | 0     | 0.167 | 0.333 |
|       |              | 1     | 0.840 | 0.733 | 0.833 | 0.905 |

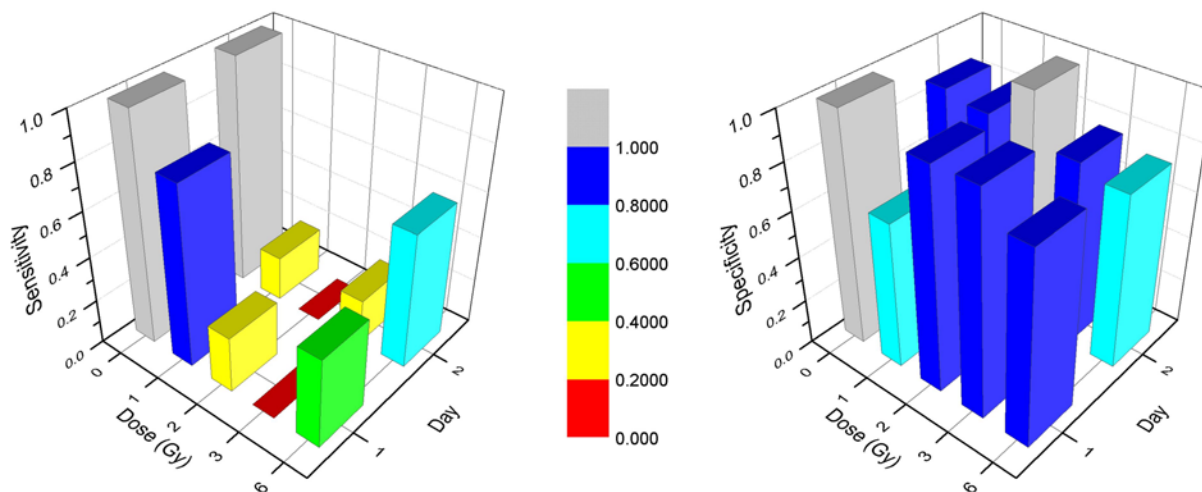

**Table S6** | Sensitivity, specificity, positive predictive values (PPV), and negative predictive values (NPV) obtained by dose discriminant analysis for classification of radiation dose groups at a given day after irradiation. Saa1 concentrations in sham, 1, 2, 3, and 6 Gy irradiated samples were used for the analysis. 3-D plots for sensitivity and specificity are shown below the table.

| Flt3lg concentration (pg/ml) after 0 Gy irradiation |                    |                    |                    |                    |                    |                    |                    |                    |                    |                    |                    |
|-----------------------------------------------------|--------------------|--------------------|--------------------|--------------------|--------------------|--------------------|--------------------|--------------------|--------------------|--------------------|--------------------|
| Day -8                                              |                    | Day 1              |                    | Day 2              |                    | Day 3              |                    | Day 5              |                    | Day 7              |                    |
| raw concen tration                                  | change from day -8 | raw concen tration | change from day -8 | raw concen tration | change from day -8 | raw concen tration | change from day -8 | raw concen tration | change from day -8 | raw concen tration | change from day -8 |
| 681                                                 | 0                  | 459                | -222               | 271                | -410               | 441                | -241               | 419                | -262               | 286                | -396               |
| 569                                                 | 0                  | 471                | -99                | 442                | -128               | 656                | 87                 | 500                | -69                | 503                | -67                |
| 537                                                 | 0                  | 477                | -60                | 257                | -280               | 291                | -246               | 346                | -191               | 518                | -19                |
| 436                                                 | 0                  | 425                | -11                | 292                | -144               | 308                | -128               | 284                | -151               | 293                | -142               |
| 483                                                 | 0                  | 430                | -54                | 350                | -133               | 365                | -118               | 300                | -184               | 451                | -32                |
| 299                                                 | 0                  | 272                | -26                | 402                | 103                | 479                | 181                | 413                | 114                | 199                | -100               |
| 357                                                 | 0                  | 266                | -91                | 435                | 78                 | 397                | 40                 | 286                | -71                | 498                | 140                |

| Flt3lg concentration (pg/ml) after 0.1 Gy irradiation |                    |                    |                    |                    |                    |                    |                    |                    |                    |                    |                    |
|-------------------------------------------------------|--------------------|--------------------|--------------------|--------------------|--------------------|--------------------|--------------------|--------------------|--------------------|--------------------|--------------------|
| Day -8                                                |                    | Day 1              |                    | Day 2              |                    | Day 3              |                    | Day 5              |                    | Day 7              |                    |
| raw concen tration                                    | change from day -8 | raw concen tration | change from day -8 | raw concen tration | change from day -8 | raw concen tration | change from day -8 | raw concen tration | change from day -8 | raw concen tration | change from day -8 |
| 327                                                   | 0                  | 385                | 58                 | 515                | 188                | 472                | 145                | 385                | 58                 | 534                | 206                |
| 85                                                    | 0                  | 151                | 66                 | 240                | 156                | 190                | 105                | 185                | 101                | 196                | 112                |
| 504                                                   | 0                  | 368                | -136               | 456                | -49                | 409                | -95                | 339                | -165               | 468                | -36                |
| 342                                                   | 0                  | 294                | -48                | 375                | 33                 | 325                | -17                | 290                | -52                | 338                | -4                 |
| 305                                                   | 0                  | 279                | -26                | 366                | 61                 | 283                | -22                | 284                | -22                | 236                | -70                |

| Flt3lg concentration (pg/ml) after 1 Gy irradiation |                    |                    |                    |                    |                    |                    |                    |                    |                    |                    |                    |
|-----------------------------------------------------|--------------------|--------------------|--------------------|--------------------|--------------------|--------------------|--------------------|--------------------|--------------------|--------------------|--------------------|
| Day -8                                              |                    | Day 1              |                    | Day 2              |                    | Day 3              |                    | Day 5              |                    | Day 7              |                    |
| raw concen tration                                  | change from day -8 | raw concen tration | change from day -8 | raw concen tration | change from day -8 | raw concen tration | change from day -8 | raw concen tration | change from day -8 | raw concen tration | change from day -8 |
| 510                                                 | 0                  | 754                | 244                | 850                | 340                | 845                | 335                | 710                | 200                | 335                | -175               |
| 244                                                 | 0                  | 544                | 300                | 901                | 657                | 915                | 671                | 707                | 463                | 469                | 225                |
| 303                                                 | 0                  | 714                | 411                | 1205               | 902                | 1144               | 841                | 848                | 545                | 456                | 153                |
| 240                                                 | 0                  | 635                | 395                | 1056               | 815                | 853                | 613                | 625                | 384                | 349                | 108                |
| 200                                                 | 0                  | 298                | 98                 | 817                | 617                | 774                | 574                | 335                | 135                | 279                | 79                 |

| Flt3lg concentration (pg/ml) after 2 Gy irradiation |                    |                    |                    |                    |                    |                    |                    |                    |                    |                    |                    |
|-----------------------------------------------------|--------------------|--------------------|--------------------|--------------------|--------------------|--------------------|--------------------|--------------------|--------------------|--------------------|--------------------|
| Day -8                                              |                    | Day 1              |                    | Day 2              |                    | Day 3              |                    | Day 5              |                    | Day 7              |                    |
| raw concen tration                                  | change from day -8 | raw concen tration | change from day -8 | raw concen tration | change from day -8 | raw concen tration | change from day -8 | raw concen tration | change from day -8 | raw concen tration | change from day -8 |
| 510                                                 | 0                  | 1483               | 973                | 1574               | 1065               | 1519               | 1009               | 1513               | 1004               | 1331               | 822                |
| 824                                                 | 0                  | 1654               | 831                | 1577               | 753                | 2469               | 1646               | 1688               | 864                | 1034               | 210                |
| 648                                                 | 0                  |                    |                    | 1346               | 698                | 1744               | 1096               | 1670               | 1022               | 843                | 194                |
| 894                                                 | 0                  | 1602               | 707                | 1558               | 663                | 2196               | 1301               | 1564               | 669                | 1062               | 168                |
| 288                                                 | 0                  | 811                | 522                | 1366               | 1077               | 1828               | 1539               | 1271               | 982                | 476                | 187                |
| 522                                                 | 0                  | 619                | 98                 | 1794               | 1272               | 2081               | 1559               | 1595               | 1074               | 701                | 180                |
| 235                                                 | 0                  | 906                | 671                | 1829               | 1594               | 1198               | 964                | 396                | 161                | 341                | 107                |
| 171                                                 | 0                  | 228                | 57                 | 622                | 451                | 1772               | 1601               | 1117               | 946                | 286                | 115                |

| Flt3lg concentration (pg/ml) after 3 Gy irradiation |  |  |  |  |  |  |  |  |  |  |  |
|-----------------------------------------------------|--|--|--|--|--|--|--|--|--|--|--|
|-----------------------------------------------------|--|--|--|--|--|--|--|--|--|--|--|

| Day -8            |                    | Day 1             |                    | Day 2             |                    | Day 3             |                    | Day 5             |                    | Day 7             |                    |
|-------------------|--------------------|-------------------|--------------------|-------------------|--------------------|-------------------|--------------------|-------------------|--------------------|-------------------|--------------------|
| raw concentration | change from day -8 |
| 215               | 0                  | 938               | 723                | 2893              | 2679               | 4539              | 4325               | 3437              | 3222               | 747               | 532                |
| 454               | 0                  | 895               | 442                | 3600              | 3146               | 5135              | 4682               | 3078              | 2624               | 1212              | 758                |
| 388               | 0                  | 850               | 462                | 2426              | 2038               | 5652              | 5265               | 5542              | 5154               | 1860              | 1472               |
| 512               | 0                  | 914               | 401                | 2972              | 2460               | 4148              | 3636               | 4315              | 3802               | 1237              | 725                |
| 380               | 0                  | 1407              | 1027               | 3263              | 2883               | 5081              | 4701               | 5118              | 4738               | 2010              | 1630               |

| Flt3lg concentration (pg/ml) after 6 Gy irradiation |                    |                   |                    |                   |                    |                   |                    |                   |                    |                   |                    |
|-----------------------------------------------------|--------------------|-------------------|--------------------|-------------------|--------------------|-------------------|--------------------|-------------------|--------------------|-------------------|--------------------|
| Day -8                                              |                    | Day 1             |                    | Day 2             |                    | Day 3             |                    | Day 5             |                    | Day 7             |                    |
| raw concentration                                   | change from day -8 | raw concentration | change from day -8 | raw concentration | change from day -8 | raw concentration | change from day -8 | raw concentration | change from day -8 | raw concentration | change from day -8 |
| 284                                                 | 0                  | 1583              | 1299               | 3045              | 2761               | 6266              | 5982               | 6268              | 5984               | 4812              | 4528               |
| 320                                                 | 0                  | 1150              | 830                | 3032              | 2712               | 4089              | 3769               | 7692              | 7372               | 5591              | 5271               |
| 550                                                 | 0                  | 1718              | 1168               | 4163              | 3612               | 6271              | 5721               | 7666              | 7116               | 6270              | 5720               |
| 250                                                 | 0                  | 1485              | 1234               | 3157              | 2907               | 6367              | 6117               | 9442              | 9191               | 6713              | 6462               |
| 543                                                 | 0                  | 1565              | 1022               | 4388              | 3846               | 6452              | 5909               | 8141              | 7598               | 4631              | 4088               |

**Table S7 |** Lists of the measurement data in Figure 5. Each row is the Flt3lg concentration and concentration change data for repeated blood samples from a single animal.

| Saa1 concentration ( $\mu\text{g/ml}$ ) after 0 Gy irradiation |                    |                    |                    |                    |                    |                    |                    |                    |                    |                    |                    |
|----------------------------------------------------------------|--------------------|--------------------|--------------------|--------------------|--------------------|--------------------|--------------------|--------------------|--------------------|--------------------|--------------------|
| Day -8                                                         |                    | Day 1              |                    | Day 2              |                    | Day 3              |                    | Day 5              |                    | Day 7              |                    |
| raw concen tration                                             | change from day -8 | raw concen tration | change from day -8 | raw concen tration | change from day -8 | raw concen tration | change from day -8 | raw concen tration | change from day -8 | raw concen tration | change from day -8 |
| 3.6                                                            | 0                  | 1.9                | -1.7               | 1.3                | -2.4               | 1.6                | -2.0               | 0.8                | -2.8               | 3.7                | 0.1                |
| 2.8                                                            | 0                  | 3.5                | 0.7                | 2.1                | -0.8               | 1.2                | -1.6               | 2.6                | -0.3               | 2.0                | -0.8               |
| 0.9                                                            | 0                  | 2.1                | 1.2                | 0.7                | -0.2               | 0.8                | -0.1               | 1.1                | 0.2                | 2.4                | 1.5                |
| 2.6                                                            | 0                  | 3.2                | 0.6                | 1.9                | -0.7               | 3.1                | 0.5                | 2.3                | -0.2               | 3.1                | 0.5                |
| 3.6                                                            | 0                  | 2.5                | -1.1               | 1.3                | -2.3               | 1.3                | -2.3               | 1.2                | -2.4               | 1.3                | -2.3               |
| 0.9                                                            | 0                  | 0.5                | -0.4               | 4.6                | 3.7                | 1.9                | 1.0                | 4.3                | 3.5                | 2.0                | 1.1                |
| 0.8                                                            | 0                  | 1.1                | 0.3                | 1.0                | 0.2                | 0.8                | 0                  | 0.5                | -0.3               | 0.7                | -0.1               |

| Saa1 concentration ( $\mu\text{g/ml}$ ) after 0.1 Gy irradiation |                    |                    |                    |                    |                    |                    |                    |                    |                    |                    |                    |
|------------------------------------------------------------------|--------------------|--------------------|--------------------|--------------------|--------------------|--------------------|--------------------|--------------------|--------------------|--------------------|--------------------|
| Day -8                                                           |                    | Day 1              |                    | Day 2              |                    | Day 3              |                    | Day 5              |                    | Day 7              |                    |
| raw concen tration                                               | change from day -8 | raw concen tration | change from day -8 | raw concen tration | change from day -8 | raw concen tration | change from day -8 | raw concen tration | change from day -8 | raw concen tration | change from day -8 |
| 2.0                                                              | 0                  | 0.4                | -1.7               | 2.2                | 0.1                | 1.1                | -1.0               | 2.3                | 0.3                | 3.3                | 1.3                |
| 0.8                                                              | 0                  | 2.6                | 1.8                | 1.8                | 1.0                | 3.4                | 2.6                | 2.5                | 1.7                | 2.5                | 1.7                |
| 1.8                                                              | 0                  | 3.7                | 1.9                | 0.9                | -0.9               | 2.5                | 0.7                | 1.9                | 0.1                | 2.8                | 1.0                |
| 2.0                                                              | 0                  | 0.8                | -1.1               | 0.8                | -1.1               | 3.1                | 1.1                | 1.4                | -0.6               | 2.7                | 0.8                |
| 0.3                                                              | 0                  | 0.6                | 0.2                | 3.9                | 3.6                | 0.5                | 0.1                | 2.7                | 2.4                | 1.9                | 1.5                |

| Saa1 concentration ( $\mu\text{g/ml}$ ) after 1 Gy irradiation |                    |                    |                    |                    |                    |                    |                    |                    |                    |                    |                    |
|----------------------------------------------------------------|--------------------|--------------------|--------------------|--------------------|--------------------|--------------------|--------------------|--------------------|--------------------|--------------------|--------------------|
| Day -8                                                         |                    | Day 1              |                    | Day 2              |                    | Day 3              |                    | Day 5              |                    | Day 7              |                    |
| raw concen tration                                             | change from day -8 | raw concen tration | change from day -8 | raw concen tration | change from day -8 | raw concen tration | change from day -8 | raw concen tration | change from day -8 | raw concen tration | change from day -8 |
| 7.8                                                            | 0                  | 47.8               | 40.0               | 39.5               | 31.7               | 2.9                | -5.0               | 2.4                | -5.4               | 8.0                | 0.1                |
| 15.3                                                           | 0                  | 69.3               | 54.1               | 19.3               | 4.0                | 15.3               | 0                  | 11.7               | -3.6               | 9.8                | -5.5               |
| 7.0                                                            | 0                  | 33.1               | 26.1               | 21.4               | 14.4               | 2.1                | -4.9               | 1.2                | -5.8               | 5.2                | -1.8               |
| 8.5                                                            | 0                  | 28.5               | 20.0               | 8.3                | -0.1               | 7.7                | -0.7               | 9.6                | 1.1                | 9.5                | 1.0                |
| 10.2                                                           | 0                  | 26.9               | 16.8               | 2.3                | -7.9               | 15.0               | 4.8                | 7.0                | -3.2               | 14.2               | 4.1                |

| Saa1 concentration ( $\mu\text{g/ml}$ ) after 2 Gy irradiation |                    |                    |                    |                    |                    |                    |                    |                    |                    |                    |                    |
|----------------------------------------------------------------|--------------------|--------------------|--------------------|--------------------|--------------------|--------------------|--------------------|--------------------|--------------------|--------------------|--------------------|
| Day -8                                                         |                    | Day 1              |                    | Day 2              |                    | Day 3              |                    | Day 5              |                    | Day 7              |                    |
| raw concen tration                                             | change from day -8 | raw concen tration | change from day -8 | raw concen tration | change from day -8 | raw concen tration | change from day -8 | raw concen tration | change from day -8 | raw concen tration | change from day -8 |
| 4.0                                                            | 0                  | 54.2               | 50.2               | 8.0                | 4.0                | 2.1                | -1.9               | 9.7                | 5.7                | 5.0                | 1.0                |
| 4.0                                                            | 0                  | 56.9               | 52.9               | 4.0                | 0                  | 1.9                | -2.0               | 1.9                | -2.0               | 1.2                | -2.8               |
| 4.3                                                            | 0                  | 53.9               | 49.5               | 24.7               | 20.4               | 1.5                | -2.8               | 2.5                | -1.9               | 1.3                | -3.0               |
| 1.4                                                            | 0                  | 116.8              | 115.4              | 9.3                | 7.9                | 1.3                | -0.1               | 2.5                | 1.1                | 0.9                | -0.5               |
| 0.2                                                            | 0                  | 61.2               | 61.0               | 19.1               | 18.9               | 1.8                | 1.6                | 1.3                | 1.1                | 0.6                | 0.3                |
| 1.3                                                            | 0                  | 69.2               | 67.9               | 19.3               | 17.9               | 1.3                | -0.1               | 1.3                | 0                  | 1.0                | -0.3               |
| 3.0                                                            | 0                  | 153.2              | 150.2              | 22.8               | 19.8               | 0.4                | -2.6               | 2.3                | -0.7               | 3.5                | 0.5                |
| 2.4                                                            | 0                  | 35.9               | 33.5               | 8.7                | 6.3                | 3.2                | 0.8                | 1.1                | -1.3               | 1.0                | -1.4               |

| Saa1 concentration ( $\mu\text{g/ml}$ ) after 3 Gy irradiation |  |  |  |  |  |  |  |  |  |  |  |
|----------------------------------------------------------------|--|--|--|--|--|--|--|--|--|--|--|
|----------------------------------------------------------------|--|--|--|--|--|--|--|--|--|--|--|

| Day -8             |                    | Day 1              |                    | Day 2              |                    | Day 3              |                    | Day 5              |                    | Day 7              |                    |
|--------------------|--------------------|--------------------|--------------------|--------------------|--------------------|--------------------|--------------------|--------------------|--------------------|--------------------|--------------------|
| raw concen tration | change from day -8 | raw concen tration | change from day -8 | raw concen tration | change from day -8 | raw concen tration | change from day -8 | raw concen tration | change from day -8 | raw concen tration | change from day -8 |
| 1.0                | 0                  | 22.1               | 21.1               | 12.9               | 11.9               | 3.9                | 3.0                | 6.8                | 5.9                | 6.2                | 5.3                |
| 1.7                | 0                  | 21.9               | 20.1               | 10.0               | 8.2                | 3.8                | 2.0                | 7.1                | 5.3                | 3.1                | 1.3                |
| 4.2                | 0                  | 51.8               | 47.6               | 19.8               | 15.5               | 7.7                | 3.5                | 3.1                | -1.1               | 6.7                | 2.5                |
| 8.7                | 0                  | 163.3              | 154.6              | 23.2               | 14.5               | 6.1                | -2.5               | 2.7                | -5.9               | 12.5               | 3.8                |
| 6.8                | 0                  | 151.0              | 144.2              | 50.9               | 44.0               | 5.3                | -1.5               | 2.9                | -3.9               | 7.1                | 0.3                |

| Saa1 concentration ( $\mu\text{g/ml}$ ) after 6 Gy irradiation |                    |                    |                    |                    |                    |                    |                    |                    |                    |                    |                    |
|----------------------------------------------------------------|--------------------|--------------------|--------------------|--------------------|--------------------|--------------------|--------------------|--------------------|--------------------|--------------------|--------------------|
| Day -8                                                         |                    | Day 1              |                    | Day 2              |                    | Day 3              |                    | Day 5              |                    | Day 7              |                    |
| raw concen tration                                             | change from day -8 | raw concen tration | change from day -8 | raw concen tration | change from day -8 | raw concen tration | change from day -8 | raw concen tration | change from day -8 | raw concen tration | change from day -8 |
| 0.9                                                            | 0                  | 171.0              | 170.0              | 26.4               | 25.5               | 1.6                | 0.6                | 0.8                | -0.1               | 19.9               | 18.9               |
| 1.2                                                            | 0                  | 51.5               | 50.3               | 6.8                | 5.6                | 0.6                | -0.6               | 0.8                | -0.4               | 0.6                | -0.6               |
| 0.5                                                            | 0                  | 95.3               | 94.8               | 12.9               | 12.3               | 1.7                | 1.1                | 1.1                | 0.5                | 0.4                | -0.2               |
| 0.3                                                            | 0                  | 56.4               | 56.2               | 8.1                | 7.9                | 1.2                | 1.0                | 0.5                | 0.2                | 0.8                | 0.5                |
| 0.3                                                            | 0                  | 108.3              | 108.0              | 11.7               | 11.3               | 1.0                | 0.6                | 0.5                | 0.1                | 0.8                | 0.4                |

**Table S8** Lists of the measurement data in Figure 6. Each row is the Saa1 concentration and concentration change data for repeated blood samples from a single animal.



DISCRIM data using Flt3lg for 2 Gy exposure groups

|            | Day -8 | Day 1  | Day 2  | Day 3  | Day 5  | Day 7  | Remarks                                                              |
|------------|--------|--------|--------|--------|--------|--------|----------------------------------------------------------------------|
| Day -8     | 5      | 0      | 0      | 0      | 0      | 3      | sensitivity: 0.625<br>specificity: 0.821<br>PPV: 0.417<br>NPV: 0.914 |
| Day 1      | 2      | 0      | 3      | 0      | 0      | 2      | sensitivity: 0<br>specificity: 0.925<br>PPV: 0<br>NPV: 0.841         |
| Day 2      | 1      | 0      | 3      | 2      | 2      | 0      | sensitivity: 0.375<br>specificity: 0.821<br>PPV: 0.300<br>NPV: 0.865 |
| Day 3      | 0      | 0      | 1      | 6      | 1      | 0      | sensitivity: 0.750<br>specificity: 0.897<br>PPV: 0.600<br>NPV: 0.946 |
| Day 5      | 1      | 1      | 3      | 2      | 1      | 0      | sensitivity: 0.125<br>specificity: 0.897<br>PPV: 0.200<br>NPV: 0.833 |
| Day 7      | 3      | 2      | 0      | 0      | 1      | 2      | sensitivity: 0.250<br>specificity: 0.872<br>PPV: 0.286<br>NPV: 0.850 |
| Error rate | Day -8 | Day 1  | Day 2  | Day 3  | Day 5  | Day 7  | Total                                                                |
|            | 0.3750 | 1.0000 | 0.6250 | 0.2500 | 0.8750 | 0.7500 | 0.6458                                                               |

DISCRIM data using Flt3lg and Saa1 for 2 Gy exposure groups

|        | Day -8 | Day 1 | Day 2 | Day 3 | Day 5 | Day 7 | Remarks                                                              |
|--------|--------|-------|-------|-------|-------|-------|----------------------------------------------------------------------|
| Day -8 | 5      | 0     | 0     | 0     | 0     | 3     | sensitivity: 0.625<br>specificity: 0.846<br>PPV: 0.455<br>NPV: 0.917 |
| Day 1  | 1      | 5     | 1     | 0     | 0     | 0     | sensitivity: 0.714<br>specificity: 1<br>PPV: 1<br>NPV: 0.952         |
| Day 2  | 1      | 0     | 5     | 0     | 2     | 0     | sensitivity: 0.625<br>specificity: 0.949<br>PPV: 0.714<br>NPV: 0.925 |
| Day 3  | 0      | 0     | 0     | 6     | 2     | 0     | sensitivity: 0.750<br>specificity: 0.923<br>PPV: 0.667<br>NPV: 0.947 |
| Day 5  | 1      | 0     | 1     | 3     | 3     | 0     | sensitivity: 0.375<br>specificity: 0.821<br>PPV: 0.300               |

|            |        |        |        |        |        |        |                                                                      |
|------------|--------|--------|--------|--------|--------|--------|----------------------------------------------------------------------|
|            |        |        |        |        |        |        | NPV: 0.865                                                           |
| Day 7      | 3      | 0      | 0      | 0      | 3      | 2      | sensitivity: 0.250<br>specificity: 0.923<br>PPV: 0.400<br>NPV: 0.857 |
| Error rate | Day -8 | Day 1  | Day 2  | Day 3  | Day 5  | Day 7  | Total                                                                |
|            | 0.3750 | 0.2857 | 0.3750 | 0.2500 | 0.6250 | 0.7500 | 0.4435                                                               |

**Table S9** | (top) Table showing the number of observations classified into days post radiation exposure and their corresponding sensitivity, specificity, positive predictive value (PPV), negative predictive value (NPV), and error rate estimates for 2 Gy exposure groups using Flt3lg concentrations alone. (bottom) Table showing the number of observations classified into days post radiation exposure and corresponding sensitivity, specificity, PPV, NPV, and error rate estimates for 2 Gy exposure groups using Flt3lg and Saa1 concentrations in combination.

DISCRIM data using Flt3lg for 6 Gy exposure groups

|            | Day -8 | Day 1  | Day 2  | Day 3  | Day 5  | Day 7  | Remarks                                                              |
|------------|--------|--------|--------|--------|--------|--------|----------------------------------------------------------------------|
| Day -8     | 5      | 0      | 0      | 0      | 0      | 0      | sensitivity: 1<br>specificity: 1<br>PPV: 1<br>NPV: 1                 |
| Day 1      | 0      | 5      | 0      | 0      | 0      | 0      | sensitivity: 1<br>specificity: 1<br>PPV: 1<br>NPV: 1                 |
| Day 2      | 0      | 0      | 5      | 0      | 0      | 0      | sensitivity: 1<br>specificity: 1<br>PPV: 1<br>NPV: 1                 |
| Day 3      | 0      | 0      | 1      | 4      | 0      | 0      | sensitivity: 0.800<br>specificity: 0.880<br>PPV: 0.571<br>NPV: 0.957 |
| Day 5      | 0      | 0      | 0      | 1      | 4      | 0      | sensitivity: 0.800<br>specificity: 1<br>PPV: 1<br>NPV: 0.962         |
| Day 7      | 0      | 0      | 1      | 2      | 0      | 2      | sensitivity: 0.400<br>specificity: 1<br>PPV: 1<br>NPV: 0.893         |
| Error rate | Day -8 | Day 1  | Day 2  | Day 3  | Day 5  | Day 7  | Total                                                                |
|            | 0.0000 | 0.0000 | 0.0000 | 0.2000 | 0.2000 | 0.6000 | 0.1667                                                               |

DISCRIM data using Flt3lg and Saa1 for 6 Gy exposure groups

|        | Day -8 | Day 1 | Day 2 | Day 3 | Day 5 | Day 7 | Remarks                                                              |
|--------|--------|-------|-------|-------|-------|-------|----------------------------------------------------------------------|
| Day -8 | 5      | 0     | 0     | 0     | 0     | 0     | sensitivity: 1<br>specificity: 0.960<br>PPV: 0.833<br>NPV: 1         |
| Day 1  | 1      | 4     | 0     | 0     | 0     | 0     | sensitivity: 0.800<br>specificity: 1<br>PPV: 1<br>NPV: 0.962         |
| Day 2  | 0      | 0     | 5     | 0     | 0     | 0     | sensitivity: 1<br>specificity: 0.920<br>PPV: 0.714<br>NPV: 1         |
| Day 3  | 0      | 0     | 1     | 4     | 0     | 0     | sensitivity: 0.800<br>specificity: 0.880<br>PPV: 0.571<br>NPV: 0.957 |
| Day 5  | 0      | 0     | 0     | 1     | 4     | 0     | sensitivity: 0.800<br>specificity: 1<br>PPV: 1                       |

|            |        |        |        |        |        |        |                                                              |
|------------|--------|--------|--------|--------|--------|--------|--------------------------------------------------------------|
|            |        |        |        |        |        |        | NPV: 0.962                                                   |
| Day 7      | 0      | 0      | 1      | 2      | 0      | 2      | sensitivity: 0.400<br>specificity: 1<br>PPV: 1<br>NPV: 0.893 |
| Error rate | Day -8 | Day 1  | Day 2  | Day 3  | Day 5  | Day 7  | Total                                                        |
|            | 0.0000 | 0.2000 | 0.0000 | 0.2000 | 0.2000 | 0.6000 | 0.2000                                                       |

**Table S10 |** (top) Table showing the number of observations classified into days post radiation exposure and their corresponding sensitivity, specificity, positive predictive value (PPV), negative predictive value (NPV), and error rate estimates for 6 Gy exposure groups using Flt3lg concentrations alone. (bottom) Table showing the number of observations classified into days post radiation exposure and corresponding sensitivity, specificity, PPV, NPV, and error rate estimates for 6 Gy exposure groups using Flt3lg and Saa1 concentrations in combination.
